# Supplementary material
Source: PubMed Central journal article supplement (PMC4294229)
Supplement: IAI.01815-14_zii999091079so1.pdf [file IAI.01815-14_zii999091079so1.pdf]

Allele113 MNKIFKISALTLAATLALSACGKKENVPAS-SASEPAAASAAQGDTS SIGNTMQQASYAM 59  
Allele137 MNTIFKISALTLAALALSACGKKEAAPA--SASEPAAASAAQGDTS SIGGTMQQASYAM 58  
Allele56 MNTIFKISALTLAALALSACGKKEAAPA--PASEPAAASAAQGDTS SIGGTMQQASYAM 58  
Allele140 MNTIFKISALTLAALALSACGKKEAAPA--SASEPAAASAAQGDTS SIGSTMQQASYAM 58  
Allele10 MNTIFKISALTLAALALSACGKKEAAPA--SASEPAAASAAQGDTS SIGGTMQQASYAM 58  
Allele8 MNTIFKISALTLAALALSACGKKEAAPA--SASEPAAASAAQGDTS SIGSTMQQASYAM 58  
Allele35 MNTIFKISALTLAALALSACGKKEAAPA--SASEPAAASAAQGDTS SIGGTMQQASYAM 58  
Allele141 MNTIFKISALTLAALALSACGKKEAAPA--SASEPAAASSAQGDTS SIGSTMQQASYAM 58  
Allele116 MNTIFKISALTLAALALSACGKKEAAPA--SASEPAAASSAQGDTS SIGSTMQQASYAM 58  
Allele24 MNKIFKISTLTLAATLALSACGKKEAAPA--SASEPAAASAAQGDTS SIGSTMQQASYAM 58  
Allele6 MNTIFKISALTLAALALSACGKKEAAPA--SASEPAAASSAQGDTS SIGSTMQQASYAM 58  
Allele118 MNTIFKISALTLAALALSACGKKEAAPA--SASEPAAASAAQGDTS SIGSTMQQASYAM 58  
Allele3 MNTIFKISALTLAALALSACGKKEAAPA--SASEPAAASSAQGDTS SIGSTMQQASYAM 58  
Allele155 MNTIFKISALTLAALALSACGKKEAAPA--SASEPAAASSAQGDTS SIGSTMQQASYAM 58  
Allele152 MNTIFKISALTLAALVLSACGKKEAAPA--SASEPAAASSAQGDTS SIGSTMQQASYAM 58  
Allele148 MNTIFKISALTLAALALSACGKKEAAPA--SASEPAAASSAQGDTS SIGSTMQQASYAM 58  
Allele147 MNTIFKISALTLAALALSACGKKEAAPA--SASEPAAASSAQGDTS SIGSTMQQASYAM 58  
Allele146 MNTIFKISALTLAALALSACGKKEAAPA--SASEPAAASSAQGDTS SIGSTMQQASYAM 58  
Allele132 MNTIFKISALTLAALALSACGKKEAAPA--SASEPAAASAAQGDTS SIGSTMQQASYAM 58  
Allele125 MNTIFKISALTLAALALSACGKKEAAPA--SASEPAAASSAQGDTS SIGSTMQQASYAM 58  
Allele63 MNTIFKISALTLAALALSACGKKEAAPA--SASEPAAASSAQGDTS SIGSTMQQASYAM 58  
Allele69 MNTIFKISALTLAALALSACGKKEAAPA--SASEPAAASSAQGDTS SIGSTMQQASYAM 58  
Allele114 MNTIFKISALTLAALALSACGKKEAAPA--SASEPAAASSAQGDTS SIGSTMQQASYAM 58  
Allele96 MNTIFKISALTLAALALSACGKKEAAPA--SASEPAAASSAQGDTS SIGSTMQQASYAM 58  
Allele112 MNTIFKISALTLAALALSACGKKEAAPA--SASEPAAASSAQGDTS SIGSTMQQASYAM 58  
Allele95 MNTIFKISALTLAALALSACGKKEAAPA--SASEPAAASSAQGDTS SIGSTMQQASYAM 58  
Allele110 MNTIFKISALTLAALALSACGKKEAAPA--SASEPAAASSAQGDTS SIGSTMQQASYAM 58  
Allele94 MNTIFKISALTLAALALSACGKKEAAPA--STSEPAASSAQGDTS SIGSTMQQASYAM 58  
Allele109 MNTIFKISALTLAALALSACGKKEATPA--SASEPAAASSAQGDTS SIGSTMQQASYAM 58  
Allele5 MNTIFKISALTLAALALSACGKKEAAPA--SASEPAAASSAQDDTS SIGSTMQQASYAM 58  
Allele13 MNTIFKISALTLAALALSACGKKEAAPA--SASEPAAASSAQGDTS SIGSTMQQASYAM 58  
Allele11 MNTIFKISALTLAALALSACGKKEAAPA--SASEPAAASSAQGDTS SIGSTMQQASYAM 58  
Allele2 MNTIFKISALTLAALALSACGKKEAAPA--SASEPAAASSAQGDTS SIGSTMQQASYAM 58  
Allele27 MNTIFKISALTLAALALSACGKKEAASASASEPAAASAAQGDTS SIGSTMQQASYAM 60  
Allele136 MNTIFKISALTLAALALSACGKKEAAPA-ATASEPAAASAAQGDTS SIGSTMQQASYAM 59  
Allele164 MNTIFKISALTLAALALSACGKKEAAPA-ATASEPAAASAAQGDTS SIGSTMQQASYAM 59  
Allele130 MNTIFKISALTLAALALSACGKKEAA-----SEPAAASAAQGDTS SIGSTMQQASYAM 54  
Allele107 MNTIFKISALTLAALALSACGKKEAA-----SEPAAASAAQGDTS SIGSTMQQASYAM 54  
Allele106 MNTIFKISALTLAALALSACGKKEAA-----SEPAAASAAQGDTS SIGSTMQQASYAM 54  
Allele105 MNTIFKISALTLAALALSACGKKEAA-----SEPAAASAAQGDTS SIGSTMQQASYAM 54  
Allele1 MNTIFKISALTLAALALSACGKKEAA-----SEPAAASAAQGDTS SIGSTMQQASYAM 54  
Allele7 MNTIFKISALTLAALALSACGKKEAA-----SEPAAASAAQGDTS SIGSTMQQASYAM 54  
Allele22 MNTIFKISALTLAALALSACGKKEAA-----SEPAAASAAQGDTS SIGSTMQQASYAM 54

\*\* . \*\*\*\*\*:\*\*\*:\*. \*\*\*\*\* . \*\*\*\*\*: \*\* \*\* \*\* \*\*\*\*\*



Allele113 KHKADAKANKEKGEAFLKENAAKDGVKTTASGLQYKITKQEGEKQPTKDDIVTVEYEGRL 179  
Allele137 KHKADAKANKEKGEAFLKENAAKDGVKTTASGLQYKITKQEGEKQPTKDDIVTVEYEGRL 178  
Allele56 KHKADAKANKEKGEAFLKENAAKDGVKTTASGLQYKITKQEGEKQPTKDDIVTVEYEGRL 178  
Allele140 KHKADAKANKEKGEAFLKENAAKDGVKTTASGLQYKITKQEGEKQPTKDDIVTVEYEGRL 178  
Allele10 KHKADAKANKEKGEAFLKENAAKDGVKTTASGLQYKITKQEGEKQPTKDDIVTVEYEGRL 178  
Allele8 KHKADAKANKEKGEAFLKENAAKDGVKTTASGLQYKITKQEGEKQPTKDDIVTVEYEGRL 178  
Allele35 KHKADAKANKEKGEAFLKENAAKDGVKTTASGLQYKITKQEGEKQPTKDDIVTVEYEGRL 178  
Allele141 KHKADAKANKEKGEAFLKENAAKDGVKTTASGLQYKITKQEGEKQPSKDDIVTVEYEGRL 178  
Allele116 KHKADAKANKEKGEAFLKENAAKDGVKTTASGLQYKITKQEGEKQPTKDDIVTVEYEGRL 178  
Allele24 KHKADAKANKEKGEAFLKENAAKDGVKTTASGLQYKITKQEGEKQPTKDDIVTVEYEGRL 178  
Allele6 KHKADAKANKEKGEAFLKENAGKESVKTTASGLQYKITKQEGEKQPTKDDIVTVEYEGRL 178  
Allele118 KHKADAKANKEKGEAFLKENAAKDGVKTTASGLQYKITKQEGEKQPTKDDIVTVEYEGRL 178  
Allele3 KHKADAKANKEKGEAFLKENAAKDGVKTTASGLQYKITKQEGEKQPTKDDIVTVEYEGRL 178  
Allele155 KHKADAKANKEKGEAFLKENAAKDGVKTTASGLQYKITKQEGEKQPTKDDIVTVEYEGRL 178  
Allele152 KHKADAKANKEKGEAFLKENAAKDGVKTTASGLQYKITKQEGEKQPTKDDIVTVEYEGRL 178  
Allele148 KHKADAKANKEKGEAFLKENAAKDGVKTTASGLQYKITKQEGEKQPTKDDIVTVEYEGRL 178  
Allele147 KHKADAKANKEKGEAFLKENAAKDGVKTTASGLQYKITKQEGEKQPTKDDIVTVEYEGRL 178  
Allele146 KHKADAKANKEKGEAFLKENAAKDGVKTTASGLQYKITKQEGEKQPTKDDIVTVEYEGRL 178  
Allele132 KHKADAKANKEKGEAFLKENAAKDGVKTTASGLQYKITKQEGEKQPTKDDIVTVEYEGRL 178  
Allele125 KHKADAKANKEKGEAFLKENAAKDGVKTTASGLQYKITKQEGEKQPTKDDIVTVEYEGRL 178  
Allele63 KHKADAKANKEKGEAFLKENAAKDGVKTTASGLQYKITKQEGEKQPSKDDIVTVEYEGRL 178  
Allele69 KHKADAKANKEKGEAFLKENAAKDGVKTTASGLQYKITKQEGEKQPSKDDIVTVEYEGRL 178  
Allele114 KHKADAKANKEKGEAFLKENAAKDGVKTTASGLQYKITKQEGEKQPTKDDIVTVEYEGRL 178  
Allele96 KHKADAKANKEKGEAFLKENAAKDGVKTTASGLQYKITKQEGEKQPTKDDIVTVEYEGRL 178  
Allele112 KHKADAKANKEKGEAFLKENAAKDGVKTTASGLQYKITKQEGEKQPTKDDIVTVEYEGRL 178  
Allele95 KHKADAKANKEKGEAFLKENAAKDGVKTTASGLQYKITKQEGEKQPTKDDIVTVEYEGRL 178  
Allele110 KHKADTKANKEKGEAFLKENAAKDGVKTTASGLQYKITKQEGEKQPTKDDIVTVEYEGRL 178  
Allele94 KHKADAKANKEKGEAFLKENAAKDGVKTTASGLQYKITKQEGEKQPTKDDIVTVEYEGRL 178  
Allele109 KHKADAKANKEKGEAFLKENAAKDGVKTTASGLQYKITKQEGEKQPTKDDIVTVEYEGRL 178  
Allele5 KHKADAKANKEKGEAFLKENAAKDGVKTTASGLQYKITKQEGEKQPTKDDIVTVEYEGRL 178  
Allele13 KHKADAKANKEKGEAFLKENAAKDGVKTTASGLQYKITKQEGEKQPTKDDIVTVEYEGRL 178  
Allele11 KHKADAKANKEKGEAFLKENAAKDGVKTTASGLQYKITKQEGEKQPTKDDIVTVEYEGRL 178  
Allele2 KHKADAKANKEKGEAFLKENAAKDGVKTTASGLQYKITKQEGEKQPTKDDIVTVEYEGRL 178  
Allele27 KHKADAKANKEKGEAFLKENAGKEGVKTTASGLQYKITKQEGEKQPTKDDIVTVEYEGRL 180  
Allele136 KHKADAKANKEKGEAFLKENAAKEGVKTTASGLQYKITKQEGEKQPTKDDIVTVEYEGRL 179  
Allele164 KHKADAKANKEKGEAFLKENAAKEGVKTTASGLQYKITKQEGEKQPTKDDIVTVEYEGRL 179  
Allele130 KHKAEAKANKEKGEAFLKENAAKDGVKTTASGLQYKITKQEGEKQPTKDDIVTVEYEGRL 174  
Allele107 KHKADAKANKEKGEAFLKENAGKESVKTTASGLQYKITKQEGEKQPTKDDIVTVEYEGRL 174  
Allele106 KHKADAKANKEKGEAFLKENAAKDGVKTTASGLQYKITKQEGEKQPSKDDIVTVEYEGRL 174  
Allele105 KHKADAKANKEKGEAFLKENAAKDGVKTTASGLQYKITKQEGEKQPSKDDIVTVEYEGRL 174  
Allele1 KHKADAKANKEKGEAFLKENAAKDGVKTTASGLQYKITKQEGEKQPSKDDIVTVEYEGRL 174  
Allele7 KHKAEAKANKEKGEAFLKENAAKDGVKTTASGLQYKITKQEGEKQPTKDDIVTVEYEGRL 174  
Allele22 KHKADAKANKEKGEAFLKENAAKDGVKTTASGLQYKITKQEGEKQPTKDDIVTVEYEGRL 174

\*\*\*\*:\*\*\*\*\*.\*:\*\*\*\*\*:\*\*\*\*:\*\*\*\*\*

Allele113 IDGTVFDSSKANGGPATFPLSQVIPGWTEGVQLLKEGGEATFYIPSNLAYREQGAGEKIG 239  
Allele137 IDGTVFDSSKANGGPAPFPLSQVIPGWTEGVRLLEKGEATFYIPSNLAYREQGAGEKIG 238  
Allele56 IDGTVFDSSKANGGPATFPLSQVIPGWTEGVRLLEKGEATFYIPSNLAYREQGAGEKIG 238  
Allele140 IDGTVFDSSKANGGPATFPLSQVIPGWTEGVRLLEKGEATFYIPSNLAYREQGAGEKIG 238  
Allele10 IDGTVFDSSKANGGPATFPLSQVIPGWTEGVRLLEKGEATFYIPSNLAYREQGAGEKIG 238  
Allele8 IDGTVFDSSKANGGPATFPLSQVIPGWTEGVRLLEKGEATFYIPSNLAYREQGAGEKIG 238  
Allele35 IDGTVFDSSKANGGPATFPLSQVIPGWTEGVRLLEKGEATFYIPSNLAYREQGAGEKIG 238  
Allele141 IDGTVFDSSKANGGTVTFPLSQVIPGWTEGVQLLKEGGEATFYIPSNLAYREQGAGEKIG 238  
Allele116 IDGTVFDSSKANGGPVTFPLSQVIPGWTEGVQLLKEGGEATFYIPSNLAYREQGAGDKIG 238  
Allele24 IDGTVFDSSKANGGPVTFPLSQVIPGWTEGVQLLKEGGEATFYIPSNLAYREQGAGDKIG 238  
Allele6 IDGTVFDSSKANGGPVTFPLSQVIPGWTEGVQLLKEGGEATFYIPSNLAYREQGAGDKIG 238  
Allele118 IDGTVFDSSKANGGPVTFPLSQVIPGWTEGVQLLKEGGEATFYIPSNLAYREQGAGDKIG 238  
Allele3 IDGTVFDSSKANGGPVTFPLSQVILGWTEGVQLLKEGGEATFYIPSNLAYREQGAGDKIG 238  
Allele155 IGGTVFDSSKANGGPVTFPLSQVIPGWTEGVQLLKEGGEATFYIPSNLAYREQGAGDKIG 238  
Allele152 IDGTVFDSSKANGGTVTFPLSQVIPGWTEGVQLLKEGGEATFYIPSNLAYREQGAGDKIG 238  
Allele148 IDGTVFDSSKANGGPVTFPLSQVIPGWTEGVQLLKEGGEATFYIPSNLAYREQGAGDKIG 238  
Allele147 IDGTVFDSSKANGGPVTFPLSQVIPGWTEGVQLLKEGGGATFYIPSNLAYREQGAGDKIG 238  
Allele146 IDGTVFDSSKANGGPVTFPLSQVIPGWTEGVQLLKEGGEATFYIPSNLAYREQSGDKIG 238  
Allele132 IDGTVFDSSKANGGTVTFPLSQVIPGWTEGVQLLKEGGEATFYIPSNLAYREQGAGDKIG 238  
Allele125 IDGTVFDSSKANGGPVTFPLSQVIPGWTEGVQLLKEGGEATFYIPSNLAYREQGAGDKIG 238  
Allele63 IDGTVFDSSKANGGPVTFPLSQVIPGWTEGVQLLKEGGEATFYIPPNLAYREQGAGDKIG 238  
Allele69 IDGTVFDSSKANGGPVTFPLSQVIPGWTEGVQLLKEGGEATFYIPSNLAYREQGAGDKIG 238  
Allele114 IDGTVFDSSKANGGPVTFPLSQVIPGWTEGVQLLKEGGEATFYIPSNLAYREQGAGDKIG 238  
Allele96 IDGTVFDSSKANGGTVTFPLSQVIPGWTEGVQLLKEGGEATFYIPSNLAYREQGAGDKIG 238  
Allele112 IDGTVFDSSKANGGPVTFPLSQVIPGWTEGVQLLKEGGEATFYIPSNLAYREQGAGDKIG 238  
Allele95 IDGTVFDSSKANGGPVTFPLSQVIPGWTEGVQLLKEGGEATFYIPSNLAYREQGAGDKIG 238  
Allele110 IDGTVFDSSKANGGPVTFPLSQVIPGWTEGVQLLKEGGEATFYIPSNLAYREQGAGDKIG 238  
Allele94 IDGTVFDSSKANGGPVTFPLSQVIPGWTEGVQLLKEGGEATFYIPSNLAYREQGAGDKIG 238  
Allele109 IDGTVFDSSKANGGPVTFPLSQVIPGWTEGVQLLKEGGEATFYIPSNLAYREQGAGDKIG 238  
Allele5 IDGTVFDSSKANGGPVTFPLSQVIPGWTEGVQLLKEGGEATFYIPSNLAYREQGAGDKIG 238  
Allele13 IDGTVFDSSKANGGTVTFPLSQVIPGWTEGVQLLKEGGEATFYIPSNLAYREQGAGDKIG 238  
Allele11 IDGTVFDSSKANGGPVTFPLSQVILGWTEGVQLLKEGGEATFYIPSNLAYREQGAGDKIG 238  
Allele2 IDGTVFDSSKANGGPVTFPLSQVIPGWTEGVQLLKEGGEATFYIPSNLAYREQGAGDKIG 238  
Allele27 IDGTVFDSSKANGGPATFPLSQVIPGWTEGVQLLKEGGEATFYIPSNLAYREQGAGEKIG 240  
Allele136 IDGTVFDSSKANGGPATFPLSQVIPGWTEGVQLLKEGGEATFYIPSNLAYREQGAGEKIG 239  
Allele164 IDGTVFDSSKANGGPATFPLSQVIPGWTEGVQLLKEGGEATFYIPSNLAYREQGAGEKIG 239  
Allele130 IDGTVFDSSKANGGPATFPLSQVIPGWTEGVQLLKEGGEATFYIPSNLAYREQGAGDKIG 234  
Allele107 IDGTVFDSSKANGGPVTFPLSQVIPGWTEGVQLLKEGGEATFYIPSNLAYREQGAGDKIG 234  
Allele106 IDGTVFDSSKANGGPVTFPLSQVIPGWTEGVQLLKEGGEATFYIPSNLAYREQGAGDKIG 234  
Allele105 IDGTVFDSSKANGGPVTFPLSQVIPGWTEGVQLLKEGGEATFYIPSNLAYREQGAGDKIG 234  
Allele1 IDGTVFDSSKANGGPVTFPLSQVIPGWTEGVQLLKEGGEATFYIPSNLAYREQGAGDKIG 234  
Allele7 IDGTVFDSSKANGGPVTFPLSQVIPGWTEGVQLLKEGGEATFYIPSNLAYREQGAGDKIG 234  
Allele22 IDGTVFDSSKANGGPVTFPLSQVIPGWTEGVQLLKEGGEATFYIPSNLAYREQGAGDKIG 234

\* \* \*\*\*\*\* . \*\*\*\*\* \*\*\*\*\*:\*\*\*\*\* \*\*\*\*\* \*\*\*\*\*:\*:\*\*

|           |                                    |     |
|-----------|------------------------------------|-----|
| Allele113 | PNSTLVFDVKLVKVGAPGNASAQQPAQVDIKKVN | 273 |
| Allele137 | PNATLVFDVKLVKIGAPENAPAKQPDQVDIKKVN | 272 |
| Allele56  | PNATLVFDVKLVKIGAPENAPAKQPDQVDIKKVN | 272 |
| Allele140 | PNATLVFDVKLVKIGAPENAPAKQPDQVDIKKVN | 272 |
| Allele10  | PNATLVFDVKLVKIGAPENAPAKQPDQVDIKKVN | 272 |
| Allele8   | PNATLVFDVKLVKIGAPENAPAKQPDQVDIKKVN | 272 |
| Allele35  | PNATLVFDVKLVKIGAPENAPAKQPDQVDIKKVN | 272 |
| Allele141 | PNATLVFDVKLVKVGAPENAPAQQPVDVKKVN   | 272 |
| Allele116 | PNATLVFDVKLVKVGAPENAPTQQPVQVDVKKVN | 272 |
| Allele24  | PNATLVFDVKLVKIGAPENAPAKQPAQVDIKKVN | 272 |
| Allele6   | PNATLVFDVKLVKIGAPENAPAKQPAQVDIKKVN | 272 |
| Allele118 | PNATLVFDVKLVKIGAPEKAPAKQPAQVDIKKVN | 272 |
| Allele3   | PNATLVFDVKLVKIGAPENAPAKQPAQVDIKKVN | 272 |
| Allele155 | PNATLVFDVKLVKIGAPENAPAKQPAQVDIKKVN | 272 |
| Allele152 | PNATLVFDVKLVKIGAPENAPAKQPAQVDIKKVN | 272 |
| Allele148 | PNATLVFDVKLVKIGAPENAPAKQPVQVDIKKVN | 272 |
| Allele147 | PNATLVFDVKLVKIGAPENAPAKQPAQVDIKKVN | 272 |
| Allele146 | PNATLVFDVKLVKIGAPENAPAKQPAQVDIKKVN | 272 |
| Allele132 | PNATLVFDVKLVKIGAPENAPAKQPAQVDIKKVN | 272 |
| Allele125 | PNTTLVFDVKLVKIGAPENAPAKQPAQVDIKKVN | 272 |
| Allele63  | PNATLVFDVKLVKIGAPENAPAKQPAQVDIKKVN | 272 |
| Allele69  | PNATLVFDVKLVKIGAPENAPAKQPAQVDIKKVN | 272 |
| Allele114 | PNATLVFDVKLVKIGAPENAPAKQPAQVDIKKVN | 272 |
| Allele96  | PNATLVFDVKLVKIGAPENAPAKQPAQVDIKKVN | 272 |
| Allele112 | PNATLVFDVKLVKIGAPENAPAKQPAQVDIKKVN | 272 |
| Allele95  | PNATLVFDVKLVKIGAPENAPAKQPAQVDIKKVN | 272 |
| Allele110 | PNATLVFDVKLVKIGAPENAPAKQPAQVDIKKVN | 272 |
| Allele94  | PNATLVFDVKLVKIGAPENAPAKQPAQVDIKKVN | 272 |
| Allele109 | PNATLVFDVKLVKIGAPENAPAKQPAQVDIKKVN | 272 |
| Allele5   | PNATLVFDVKLVKIGAPENAPAKQPAQVDIKKVN | 272 |
| Allele13  | PNATLVFDVKLVKIGAPENAPAKQPAQVDIKKVN | 272 |
| Allele11  | PNATLVFDVKLVKIGAPENAPAKQPAQVDIKKVN | 272 |
| Allele2   | PNATLVFDVKLVKIGAPENAPAKQPAQVDIKKVN | 272 |
| Allele27  | PNSTLVFDVKLVKVGAPENASAQQPAQVDIKKVN | 274 |
| Allele136 | PNATLVFDVKLVKVGAPENAPAKQPVQVDIKKVN | 273 |
| Allele164 | PNATLVFDVKLVKVGAPENAPAKQPVQVDIKKVN | 273 |
| Allele130 | PNATLVFDVKLVKVGAPENAPAKQPVQVDIKKVN | 268 |
| Allele107 | PNATLVFDVKLVKIGAPENAPAKQPAQVDIKKVN | 268 |
| Allele106 | PNATLVFDVKLVKIGSPENAPAKQPAQVDIKKVN | 268 |
| Allele105 | PNATLVFDVKLVKIGAPENAPAKQPAQVDIKKVN | 268 |
| Allele1   | PNATLVFDVKLVKIGAPENAPAKQPAQVDIKKVN | 268 |
| Allele7   | PNATLVFDVKLVKIGAPENAPAKQPAQVDIKKVN | 268 |
| Allele22  | PNATLVFDVKLVKIGAPENAPAKQPAQVDIKKVN | 268 |

\*\*\*:\*\*\*\*\*:\*\*\*: \* : \* : \*\* \*\*\*:\*\*\*\*

**Supplemental Figure S1. Clustal alignment of the non-redundant translated amino acid sequences for MIP proteins corresponding to known alleles found in meningococcal and gonococcal isolates in the [pubmlst.org/Neisseria](http://pubmlst.org/Neisseria) database.**

**Gonococcal alleles are marked in red.**

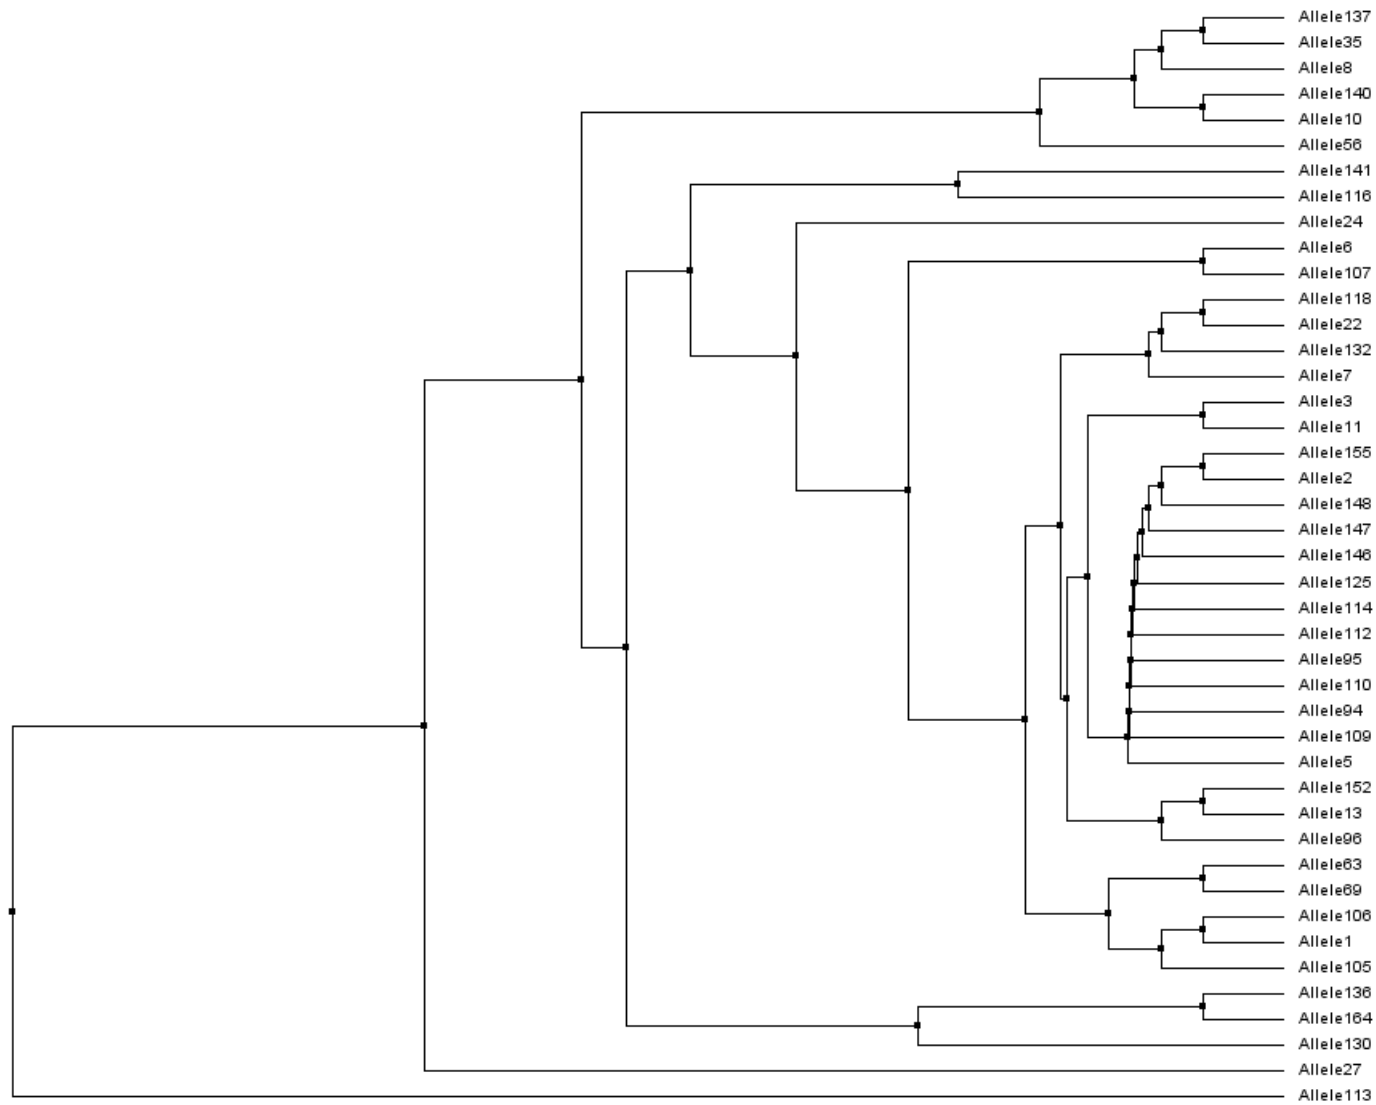

**Supplemental Figure S2. Dendrogram showing the clustering of non-redundant MIP proteins in meningococcal and gonococcal isolates in the [pubmlst.org/Neisseria](http://pubmlst.org/Neisseria) database.**

| Neisseria allele                                                          | Meningococcal Serogroup and number of isolates |             |            |          |            |          |            |          |           |            | Gonococci  | Totals      | % isolate coverage |     |    |
|---------------------------------------------------------------------------|------------------------------------------------|-------------|------------|----------|------------|----------|------------|----------|-----------|------------|------------|-------------|--------------------|-----|----|
|                                                                           | A                                              | B           | C          | E        | W          | X        | Y          | Z        | NG        | ND         |            |             | B only             | all |    |
| 137                                                                       |                                                |             |            |          |            |          |            |          |           |            |            | 1           | 1                  |     |    |
| 35 (+P9)                                                                  |                                                |             |            |          |            |          |            |          |           |            |            | 163         | 163                |     |    |
| 8 (+34)                                                                   |                                                |             |            |          |            |          |            |          |           |            |            | 5           | 5                  |     |    |
| 140                                                                       |                                                |             |            |          |            |          |            |          |           |            |            | 2           | 2                  |     |    |
| 10 (+138+139)                                                             |                                                |             |            |          |            |          |            |          |           |            |            | 235         | 235                |     |    |
| 56                                                                        |                                                |             |            |          |            |          |            |          |           |            |            | 1           | 1                  |     |    |
| 141                                                                       |                                                |             |            |          |            |          |            |          |           |            | 1          |             | 1                  |     |    |
| 116                                                                       |                                                | 6           |            |          |            |          |            |          |           |            | 1          |             | 7                  |     |    |
| 24                                                                        |                                                | 1           |            |          |            |          |            |          |           |            |            |             | 1                  |     |    |
| 6 (+23+30+128, MC54) (III*)                                               |                                                | 21          | 9          |          | 2          |          | 3          |          | 2         | 39         |            |             | 76                 | 2   | 2  |
| 107 (+127)                                                                |                                                |             |            | 1        |            |          |            |          |           | 5          |            |             | 6                  |     |    |
| 118                                                                       |                                                |             | 1          |          |            |          |            |          |           |            |            |             | 1                  |     |    |
| 22 (+31+32+70+111+121+57+117<br>+126+149)                                 | 2                                              | 43          | 17         |          | 12         | 1        | 24         | 1        | 2         | 24         |            |             | 126                |     |    |
| 132 (+145)                                                                |                                                | 3           |            |          |            |          |            |          |           |            |            |             | 3                  |     |    |
| 7 (+68)                                                                   | 20                                             | 15          | 1          |          | 2          |          | 165        |          | 2         | 63         |            |             | 268                |     |    |
| 3                                                                         | 1                                              |             |            |          |            |          |            |          |           |            |            |             | 1                  |     |    |
| 11 (+122)                                                                 | 15                                             | 1           |            |          |            |          |            |          |           |            |            |             | 16                 |     |    |
| 155                                                                       |                                                | 1           |            |          |            |          |            |          |           |            |            |             | 1                  |     |    |
| 2 (+4+12+14+25+104+93+97+123+98+124<br>+99+73+129+150+153+171, MC58) (I*) | 44                                             | 1071        | 46         | 4        | 14         | 3        | 36         |          | 39        | 302        |            |             | 1559               | 75  | 47 |
| 148                                                                       |                                                | 1           |            |          |            |          |            |          |           |            |            |             | 1                  |     |    |
| 147                                                                       |                                                | 1           |            |          |            |          |            |          |           |            |            |             | 1                  |     |    |
| 146                                                                       |                                                | 1           |            |          |            |          |            |          |           |            |            |             | 1                  |     |    |
| 125                                                                       |                                                |             |            |          |            |          |            |          |           | 4          |            |             | 4                  |     |    |
| 114                                                                       |                                                | 1           |            |          |            |          |            |          |           |            |            |             | 1                  |     |    |
| 112                                                                       |                                                | 1           |            |          |            |          |            |          |           |            |            |             | 1                  |     |    |
| 95                                                                        |                                                | 1           |            |          |            |          |            |          |           |            |            |             | 1                  |     |    |
| 110                                                                       |                                                | 1           |            |          |            |          |            |          |           |            |            |             | 1                  |     |    |
| 94                                                                        |                                                | 4           |            |          |            |          |            |          |           |            |            |             | 4                  |     |    |
| 109                                                                       |                                                | 10          |            |          |            |          |            |          |           |            |            |             | 10                 |     |    |
| 5 (+115)                                                                  |                                                | 2           | 1          |          |            |          |            |          | 1         | 3          |            |             | 7                  |     |    |
| 152                                                                       |                                                | 1           |            |          |            |          |            |          |           |            |            |             | 1                  |     |    |
| 13 (+26+151)                                                              | 1                                              | 150         | 1          |          | 1          |          | 36         |          | 3         | 20         |            |             | 212                |     |    |
| 96                                                                        |                                                | 1           |            |          |            |          |            |          |           |            |            |             | 1                  |     |    |
| 63                                                                        |                                                |             |            |          |            |          |            |          | 2         | 7          |            |             | 9                  |     |    |
| 69                                                                        |                                                | 3           |            |          |            |          |            |          |           | 6          |            |             | 9                  |     |    |
| 106                                                                       |                                                |             |            |          | 1          |          |            |          |           |            |            |             | 1                  |     |    |
| 1 (+161+108+154+172, MC90) (II*)                                          | 1                                              | 78          | 246        | 2        | 511        |          |            | 1        | 6         | 123        |            |             | 968                | 5   | 29 |
| 105                                                                       |                                                | 1           |            |          |            |          |            |          |           | 2          |            |             | 3                  |     |    |
| 136                                                                       |                                                |             |            |          |            |          |            |          |           | 2          |            |             | 2                  |     |    |
| 164                                                                       |                                                |             |            |          |            |          |            |          | 1         |            |            |             | 1                  |     |    |
| 130                                                                       |                                                |             |            |          |            |          |            |          |           | 1          |            |             | 1                  |     |    |
| 27                                                                        |                                                |             |            |          |            |          |            |          |           | 2          |            |             | 2                  |     |    |
| 113                                                                       |                                                | 1           |            |          |            |          |            |          |           |            |            |             | 1                  |     |    |
| <b>Total isolate numbers</b>                                              | <b>84</b>                                      | <b>1420</b> | <b>322</b> | <b>7</b> | <b>543</b> | <b>4</b> | <b>264</b> | <b>2</b> | <b>58</b> | <b>605</b> | <b>407</b> | <b>3716</b> |                    |     |    |



**Supplemental Table S1. Distribution of isolates expressing different MIP proteins in meningococcal and gonococcal isolates in the pubmlst.org/*Neisseria* database.** \*Defined as Type I, II and III proteins in Hung MC, Salim O, Williams JN, Heckels JE, Christodoulides M. The *Neisseria meningitidis* macrophage infectivity potentiator protein induces cross-strain serum bactericidal activity and is a potential serogroup B vaccine candidate. *Infect Immun.* 2011 Sep;79(9):3784-91. doi: 10.1128/IAI.05019-11. Epub 2011 Jun 27.
